# Supplementary material for: Comprehensive high-throughput image analysis for therapeutic efficacy of architecturally complex heterotypic organoids
Source: PubMed Central journal article supplement (PMC5709388; doi:10.1038/s41598-017-16622-9), 2017-11-30
Supplement: 41598_2017_16622_MOESM1_ESM.pdf [file 41598_2017_16622_MOESM1_ESM.pdf]

**SUPPLEMENTAL INFORMATION**

**Comprehensive high-throughput image analysis for therapeutic efficacy of  
architecturally complex heterotypic organoids**

Anne-Laure Bulin<sup>#</sup>, Mans Broekgaarden<sup>#</sup>, and Tayyaba Hasan<sup>\*</sup>

*Wellman Center for Photomedicine, Department of Dermatology, Harvard Medical School and  
Massachusetts General Hospital, 40 Blossom Street, 02114 Boston, MA.*

*thasan@mgh.harvard.edu*

Figure S1

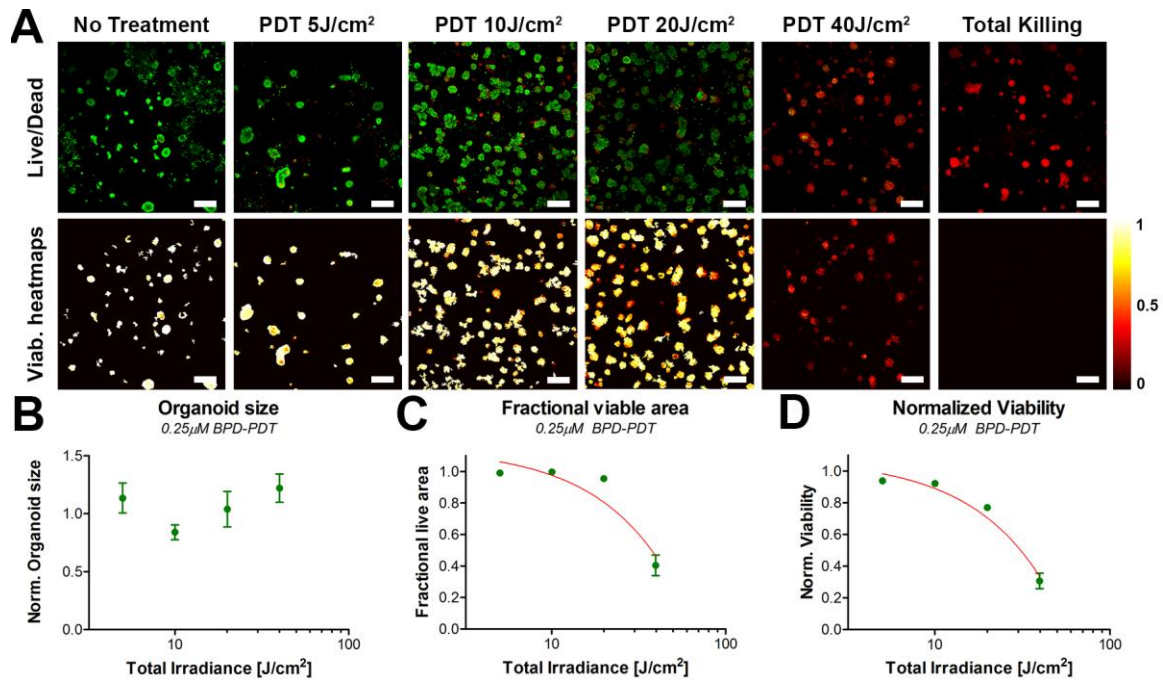

**Figure S1:** Dose response relation between the total light irradiance of PDT and organoid size, fractional viable area, and normalized viability on OVCAR-5 human ovarian carcinoma cells grown as 3D adherent cultures. (A) Live/dead images of calcein and PI fluorescence were superimposed in ImageJ and depicted side-by-side with the corresponding viability heatmaps. Scalebar = 400μm. (B-D) Dose response correlations between the PDT radiant exposure and the total organoid area (mean ± SEM) (B), median fractional live area (mean ± SEM) (C), and the median viability of the tumor nodules (mean ± SEM) (C). Data represents three replicate experiments in which N = 24-36.

Figure S2

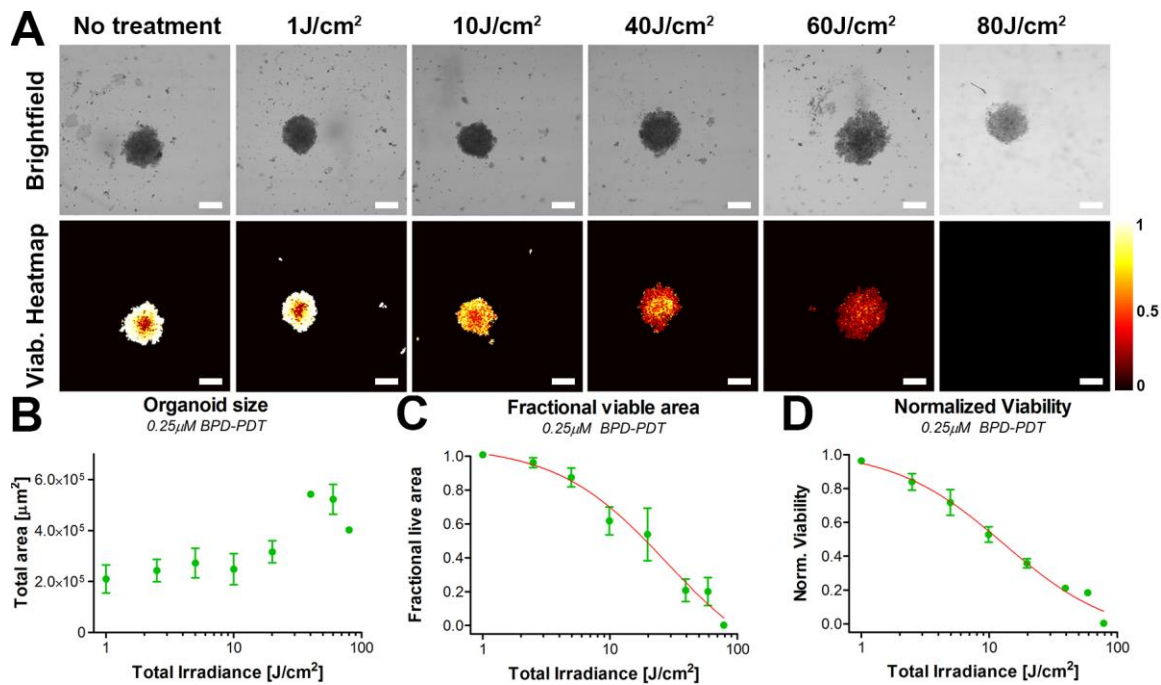

**Figure S2:** Primary output parameters obtained through CALYPSO enables to report the effect of PDT on AsPC-1 spheroids grown as monoculture in suspension. (A) Representative brightfield images of the nodules are depicted side-by-side with the corresponding viability heatmaps for increasing doses of PDT. (B-D) Dose response correlations between the PDT radiant exposure and the total organoid area (mean  $\pm$  SEM) (B), median fractional live area (mean  $\pm$  SEM) (C), and the median viability of the tumor nodules (mean  $\pm$  SEM) (D). Data represents a single representative experiment (N = 4).

Figure S3

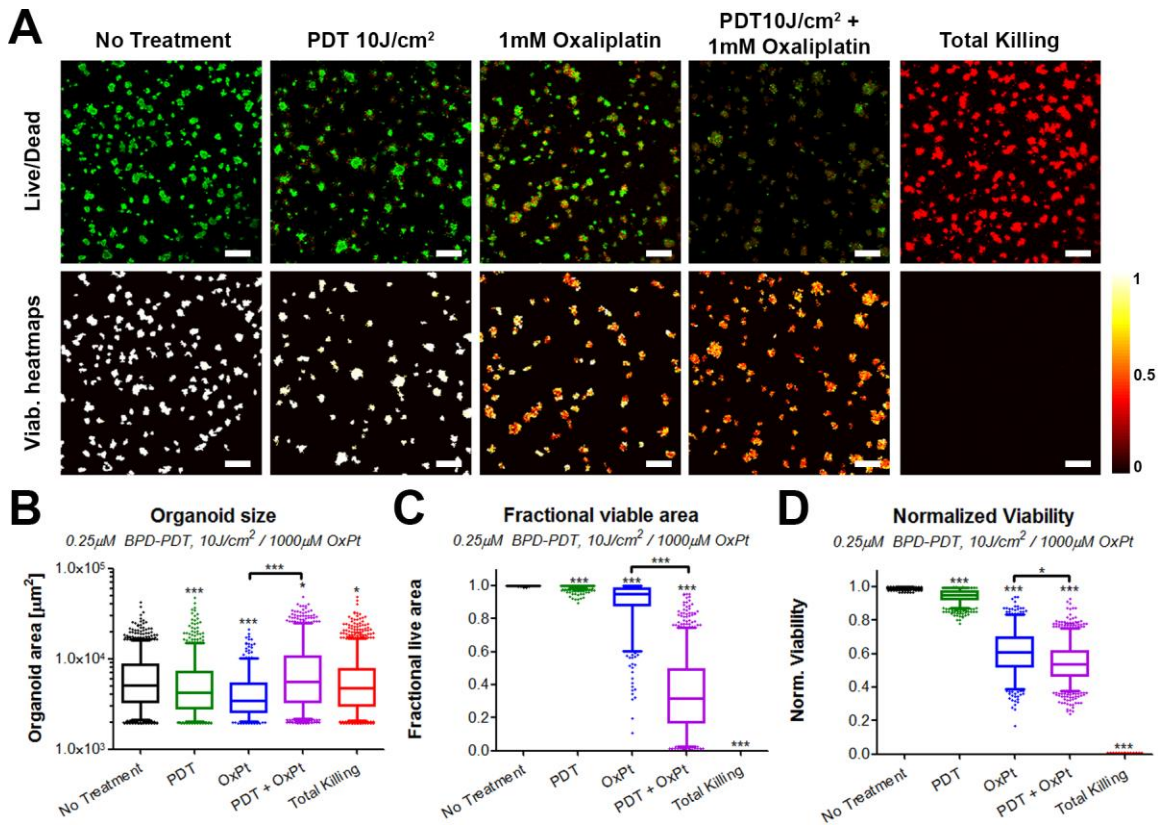

**Figure S3:** Analysis of treatment effects on 3D adherent AsPC-1 cultures following PDT, Oxaliplatin (OxPt) chemotherapy, or a combination therapy consisting of PDT with subsequent OxPt. **(A)** Live/dead images of calcein and PI fluorescence were superimposed in ImageJ and depicted side-by-side with the corresponding viability heatmaps. Scalebar = 400 μm. **(B-D)** Box-whisker plots depicting the spread of the data pertaining to the organoid size, fractional viable area, and normalized viability of the AsPC-1 organoids following treatment with either PDT (green), OxPt (blue), or a combination therapy of PDT+OxPt (purple). No treatment controls and total killing controls are depicted in black and red, respectively. All box-whisker plots depict the median, 25<sup>th</sup> and 75<sup>th</sup> percentile, the 95% confidence interval, and the outliers, which were extracted and depicted on a nodule-by-nodule basis. Data was obtained from a single representative experiment comprising a sample size of ~800-1200 tumor organoids per condition.

Figure S4

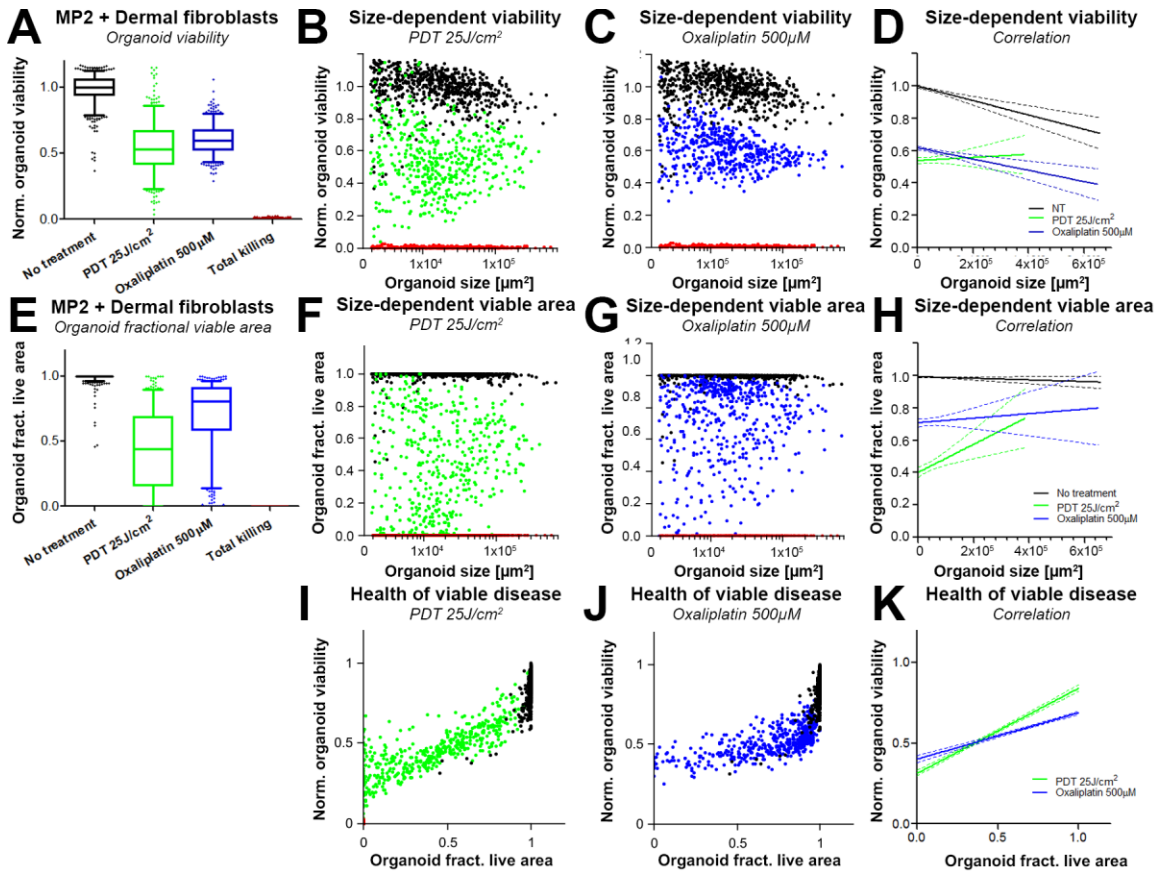

**Figure S4:** The spread of the individual organoid viabilities following treatment is depicted in (A), displaying the median, 25<sup>th</sup> and 75<sup>th</sup> percentile, and the 95% confidence interval. Organoid viabilities plotted against the organoid size (total area) are depicted in panels (B) and (C), for which the linear fits  $\pm$  95% CI are plotted in (D). The spread in fractional live area of the individual organoid following treatment is depicted in (E), displaying the median, 25<sup>th</sup> and 75<sup>th</sup> percentile, and the 95% confidence interval. Fractional live areas are plotted against the organoid size (total area) in panels (F) and (G), for which the linear fits  $\pm$  95% CI are plotted in (H). The individual organoid viability as a function of fractional live area after PDT and chemotherapy are plotted in panels (I) and (J), for which the linear correlation fits are plotted in panel (K).
